# Supplementary material for: Endogenous Phytohormone and Transcriptome Analysis Provided Insights into Seedling Height Growth of Pinus yunnanensis
Source: MDPI journal article supplement (doi:10.3390/f15030489), 2024-03-06
Supplement: s1 [file s1]

**Supplementary Table S1.** Growth status of *P. yunnanensis* seedlings of different grades in different months.

| Month    | Grade | Plant height | Ground diameter | Plant height increment | Average Plant height | Average ground diameter | N    |
|----------|-------|--------------|-----------------|------------------------|----------------------|-------------------------|------|
| January  | A     | 6.83±0.05a   | 1.76±0.02a      |                        |                      |                         |      |
|          | B     | 5.07±0.02b   | 1.39±0.02b      |                        | 5.23±1.47            | 1.44±0.75               | 1197 |
|          | C     | 3.54±0.04c   | 1.13±0.02c      |                        |                      |                         |      |
| March    | A     | 8.15±0.06a   | 3.05±0.05a      | 1.32                   |                      |                         |      |
|          | B     | 6.13±0.02b   | 2.59±0.03b      | 1.06                   | 6.09±1.70            | 2.49±0.85               | 1151 |
|          | C     | 4.28±0.04c   | 1.91±0.03c      | 0.74                   |                      |                         |      |
| May      | A     | 9.74±0.08a   | 4.12±0.06a      | 1.59                   |                      |                         |      |
|          | B     | 7.29±0.03b   | 3.59±0.05b      | 1.16                   | 7.47±1.95            | 3.50±1.78               | 1089 |
|          | C     | 5.23±0.05c   | 2.66±0.06c      | 0.95                   |                      |                         |      |
| August   | A     | 12.35±0.12a  | 6.21±0.10a      | 2.61                   |                      |                         |      |
|          | B     | 9.37±0.03b   | 5.75±0.08b      | 2.08                   | 9.44±2.33            | 5.56±1.82               | 1060 |
|          | C     | 7.01±0.05c   | 4.72±0.10c      | 1.78                   |                      |                         |      |
| December | A     | 13.86±0.13a  | 9.77±0.14a      | 1.51                   |                      |                         |      |
|          | B     | 10.76±0.03b  | 8.91±0.13b      | 1.39                   | 10.84±2.40           | 8.75±2.72               | 1035 |
|          | C     | 8.39±0.05c   | 7.68±0.15c      | 1.38                   |                      |                         |      |

**Supplementary Table S2.** Pearson correlation between plant height and hormone content and expression quantity of different grades of *P. yunnanensis*

| Hormone             | Index        | Plant height | Auxins  | CTKs    | ABA    | JA    | SA |
|---------------------|--------------|--------------|---------|---------|--------|-------|----|
| Content             | Plant height | 1            |         |         |        |       |    |
|                     | Auxins       | -0.809       | 1       |         |        |       |    |
|                     | CTKs         | -0.809       | 1.000** | 1       |        |       |    |
|                     | ABA          | 0.798        | -1.000* | -1.000* | 1      |       |    |
|                     | JA           | 0.399        | 0.216   | 0.216   | -0.235 | 1     |    |
|                     | SA           | -0.540       | 0.932   | 0.932   | -0.938 | 0.556 | 1  |
| Expression quantity | Plant height | 1            |         |         |        |       |    |
|                     | Auxins       | -0.876       | 1       |         |        |       |    |
|                     | CTKs         | 0.843        | -0.998* | 1       |        |       |    |
|                     | ABA          | 0.904        | -0.998* | 0.992   | 1      |       |    |
|                     | JA           | -0.192       | 0.642   | -0.690  | -0.593 | 1     |    |
|                     | SA           | 0.077        | 0.414   | -0.473  | -0.356 | 0.964 | 1  |

**Supplementary Table S3.** Primers of differentially expressed genes qRT-PCR

| Sequence number | Primer name | Forward sequence (5'→3') | Reverse sequence (3'→5') |
|-----------------|-------------|--------------------------|--------------------------|
| 1               | PITA_05631  | GCGATCAGACGCTGCACTTT     | CAACTCCTCCGCGAGAACCT     |
| 2               | PITA_28368  | GGATGCTTGCAGTGTCTGCA     | GCCACGCATATGTTTCCACC     |

|   |                 |                      |                      |
|---|-----------------|----------------------|----------------------|
| 3 | PITA_28172      | GTCGATCCAGTCGCTGAGCT | GGCAGTTTTTGCCTCAGCAT |
| 4 | PITA_27027      | GCGCTGCAAAGCCTCATAAT | GCAACAGGCCATAGCTCCAC |
| 5 | PITA_14214      | ACAGGCAGCCTTGCTAGTGC | TTTGGCTTTGCATGTACCCC |
| 6 | PITA_23129      | CGTTCATCCTGTCTTTGCGC | CGAGAGCCACCCTCAACCTT |
| 7 | PITA_00012      | AACGCGGTACCCATTCCAGT | CCATCCCCTTTTCCAACGAC |
| 8 | PITA_14341      | GTTTTGAACTGACTCGCGGC | CAGGATTGGAGCGCTTGAAC |
| 9 | PITA_43709 (IR) | ATATGACGGCGTCTGTTCCG | AATCACCATGCGAAGAACCG |

---

IR: internal reference gene.
